# Supplementary material for: Vestibular dysfunction leads to cognitive impairments: State of knowledge in the field and clinical perspectives (Review)
Source: PubMed Central journal article supplement — Int J Mol Med. 2024 Feb 23;53(4):36. doi: 10.3892/ijmm.2024.5360 (PMC10914312; doi:10.3892/ijmm.2024.5360), 2024-02-23

Figure S1. Detailed diagrams of the four proposed pathways to transmit vestibular information to cortical centers involved in cognition: i) Thalamo-cortical pathway; ii) theta generating pathway; iii) cerebello-cortical pathway; and iv) head direction pathway [reproduced from (177)]. ADN, anterodorsal nucleus of the thalamus; DTN, dorsal tegmental nucleus; Int, interpositus; FN, fastigial nucleus; LMN, lateral mammillary nuclei; EC, entorhinal cortex; MG, medial geniculate nucleus; Parietal C, parietal cortex; Post HT, posterior hypothalamus; PPT, pedunculopontine tegmental nucleus; Pulv, pulvinar; RPO, reticularis pontis oralis; SuM, supramammillary nucleus; VLN, ventral lateral nucleus of the thalamus; VNC, vestibular nucleus complex; VP, ventral posterior nucleus.

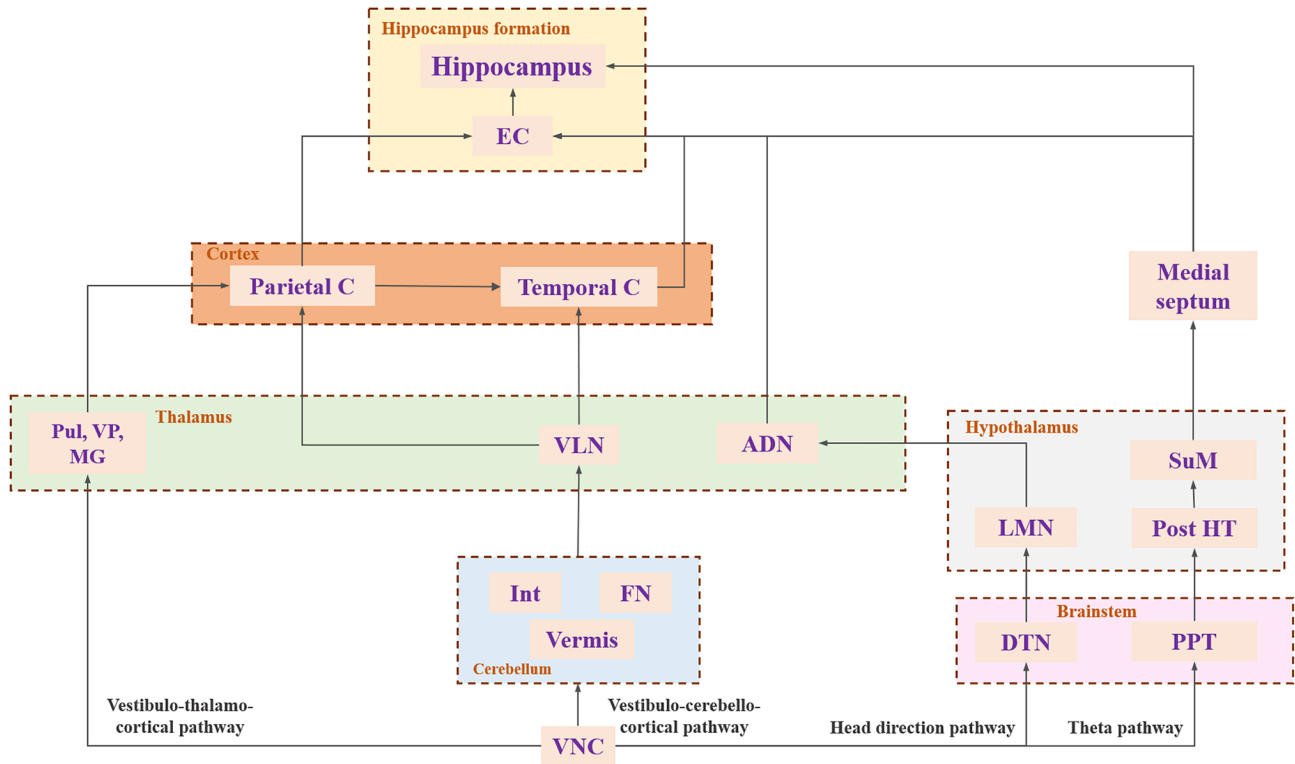

Supplement: Supplementary_Data.pdf [file Supplementary_Data.pdf]
